# Supplementary material for: Modification of Monolignol Biosynthetic Pathway in Jute: Different Gene, Different Consequence
Source: PubMed Central journal article supplement (PMC5209690; doi:10.1038/srep39984), 2017-01-04
Supplement: srep39984-s1.pdf [file srep39984-s1.pdf]

# Modification of Monolignol Biosynthetic Pathway in Jute: Different Gene, Different Consequence

Farhana Shafrin<sup>1</sup>, Ahlan Sabah Ferdous<sup>1</sup>, Suprovath Kumar Sarkar<sup>1</sup>, Rajib Ahmed<sup>1</sup>, Al- Amin<sup>1</sup>, Kawsar Hossain<sup>1</sup>, Mrinmoy Sarker<sup>1</sup>, Jorge Rencoret<sup>2</sup>, Ana Gutiérrez<sup>2</sup>, Jose C. del Rio<sup>2</sup>, Neeti Sanan-Mishra<sup>3</sup>, Haseena Khan<sup>1</sup>\*

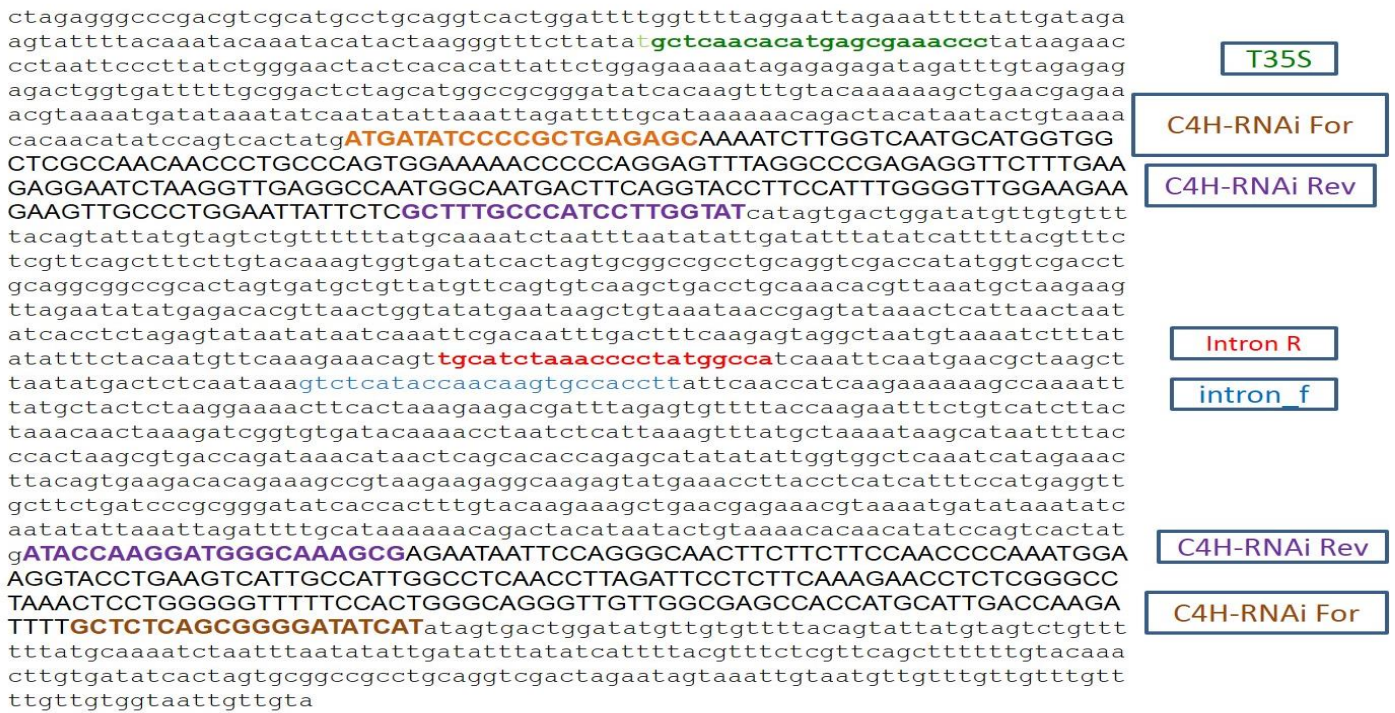

Figure 1.1: Sequence of C4H-RNAi construct

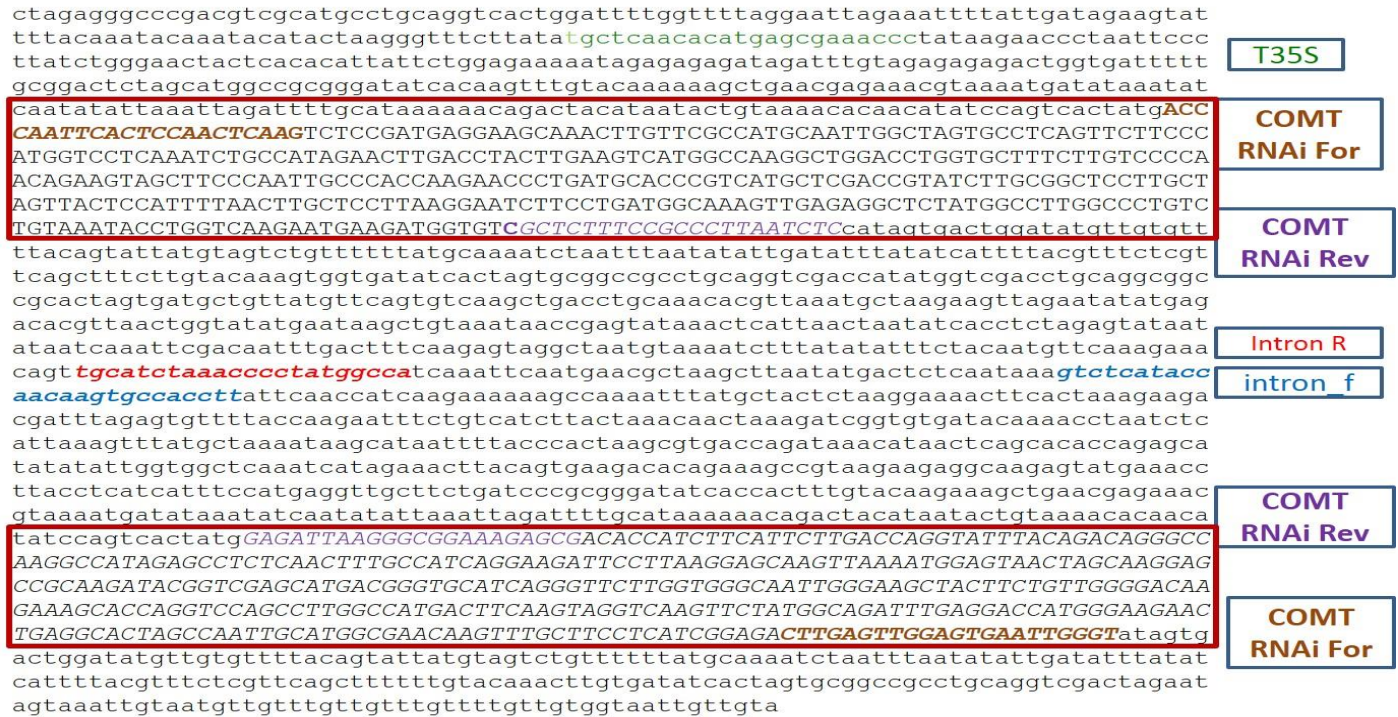

Figure 1.2: Sequence of COMT-RNAi construct

**Supplementary Table 1:** List of Primers

| Primer name         | Sequence                            | Tm(°C) |
|---------------------|-------------------------------------|--------|
| COMT_Degenerate_for | 5'-ATGRGTTTCRACYGGTKAAAC-3'         | 60.0   |
| COMT_Degenerate_rev | 5'-TTATRTGYCAACARCTACACG-3'         |        |
| C4H_Degenerate_for  | 5'-ATGGRTCTYCTCTTCCTRGAG-3'         | 59.0   |
| C4H_Degenerate_rev  | 5'-TTAARAACYGCGTGRCTTAC-3'          |        |
| COMT_GSP_FOR        | 5'-TACCCGGGATGGGTCAACTGC-3'         | 60.0   |
| COMT_GSP_REV        | 5'-TGGAGCTCTTAAACAGTTTTGAGGAACTC-3' |        |
| C4H_GSP_FOR         | 5'-ATCCCGGGATGGATCTTCTCTTCCTGGAG-3' | 58.0   |
| C4H_GSP_REV         | 5'-ATGAGCTCTTAAAACTGCGTGGCTTAC-3'   |        |
| C4H-RNAi_For        | 5'- ATGATATCCCCGCTGAGAGC-3'         | 58.0   |
| C4H-RNAi_Rev        | 5'- GCTTTGCCCATCCTTGGTAT-3'         |        |
| COMT-RNAi_For       | 5'- ACCCAATTCCTCCAACCTCAAG-3'       | 59.0   |
| COMT-RNAi_Rev       | 5'-CGCTCTTTCCGCCCTTAATCTC-3'        |        |
| Intron F            | 5'-GTCTCATACCAACAAGTGCCACCTT-3'     | 60.0   |
| Intron R            | 5'-TGCATCTAAACCCCTATGGCCA-3'        |        |
| Actin For           | 5'-TGGTATTGGATGTTGGAGAT-3'          | 58.0   |
| Actin Rev           | 5'-GGTATTGACTTAATGCTGCT-3'          |        |

**Supplementary Table 2:** P values from one way ANOVA test for each parameters described in the text.

Alpha value = 0.05. Significance. Codes for P value: '\*\*\*' <0.001 '\*\*' < 0.01 '\*' < 0.05 '.' <0.1 ' ' <1

| Parameters                                  | P value      |
|---------------------------------------------|--------------|
| Plant height                                | 0.363        |
| Plant width                                 | 0.0371.      |
| Pod number                                  | 1.64e-08 *** |
| Pod length                                  | 0.058.       |
| % Klason lignin (whole stem)                | <2e-16 ***   |
| % Klason lignin (fiber)                     | <2e-16 ***   |
| % Cellulose (whole stem)                    | 5.65e-14 *** |
| Ratio of cellulose to lignin                | <2e-16 ***   |
| Amount of glucose released (mg/g of sample) | 8.11e-05 *** |
| S (%)                                       | 1.95e-15 *** |
| G (%)                                       | 1.95e-15 *** |
| S/G=                                        | 2.38e-14 *** |
| P Coumarates (%)*                           | 0.00493 **   |

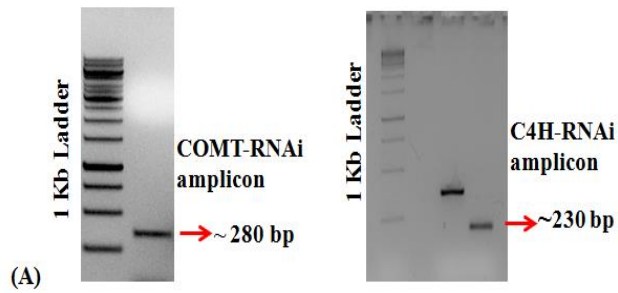

**Figure 2:** Agarose gel electrophoreses illustrates the RNAi-primer based amplification of COMT and C4H gene

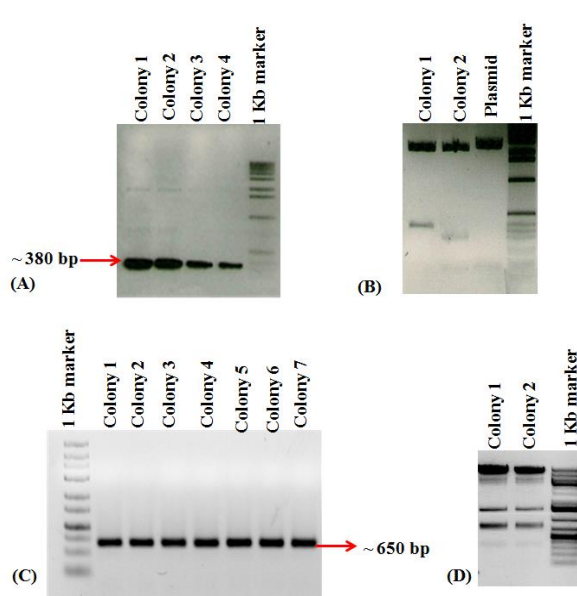

**Figure 3.1:** Represents the cloning confirmation for COMT-RNAi. (A) Colony PCR from pENTER11 (B) COMT-RNAi insert release from pENTER11 (C) Colony PCR from destination vector pK7GWIWG (II) (D) Insert release from destination vector upon restriction digestion with *BamHI/XhoI*.

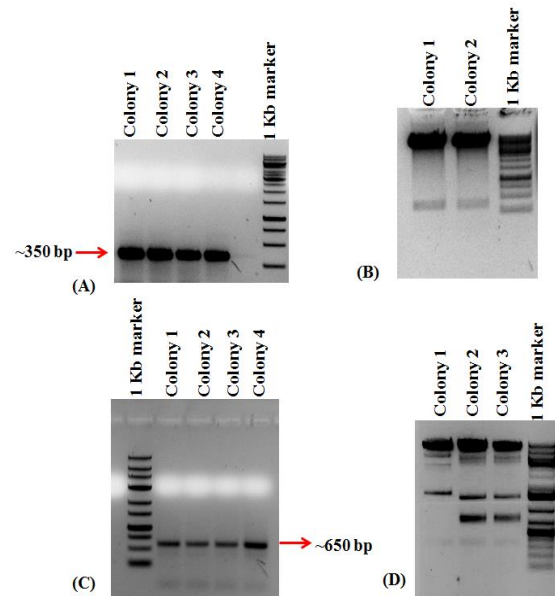

**Figure 3.2:** Shows the cloning confirmation for C4H-RNAi. (A) Colony PCR from pENTER11 (B) C4H-RNAi insert release from pENTER11 (C) Colony PCR from destination vector pK7GWIWG (II) (D) Insert release from destination vector upon restriction digestion with *BamHI/XhoI*
